# Supplementary material for: 3D–2D heterostructure of PdRu/NiZn oxyphosphides with improved durability for electrocatalytic methanol and ethanol oxidation
Source: Royal Society of Chemistry journal article supplement (doi:10.1039/c8nr03386b), 2018-01-01
Supplement: c8nr03386b1.pdf [file c8nr03386b1.pdf]

## Supporting Information

### 3D-2D Heterostructure of PdRu/NiZn Oxyphosphides with Improved Durability for Electrocatalytic Methanol and Ethanol Oxidation

Hui Xu, Pingping Song, Yangping Zhang, and Yukou Du \*

*College of Chemistry, Chemical Engineering and Materials Science, Soochow*

*University, Suzhou 215123, PR China*

\* Corresponding author: Tel: 86-512-65880089, Fax: 86-512-65880089;

E-mail: [duyk@suda.edu.cn](mailto:duyk@suda.edu.cn) (Y. Du).

#### Figures and Tables

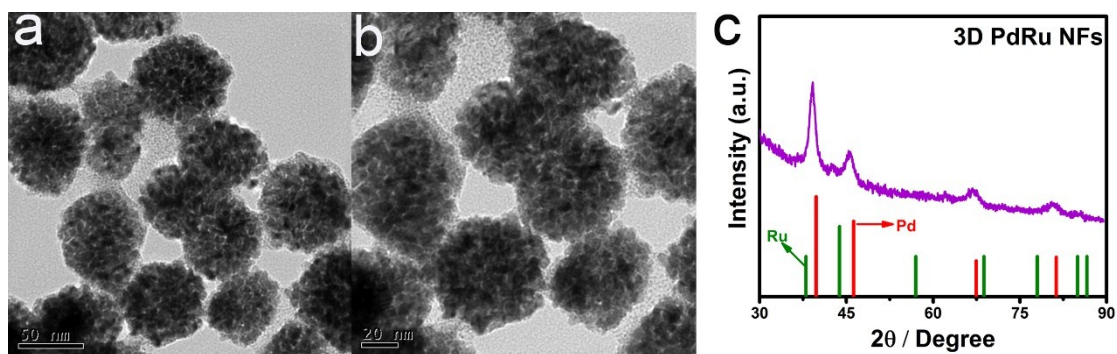

Figure S1 (a and b) Representative TEM images of 3D PdRu NFs with different magnifications and its (c) XRD patterns.

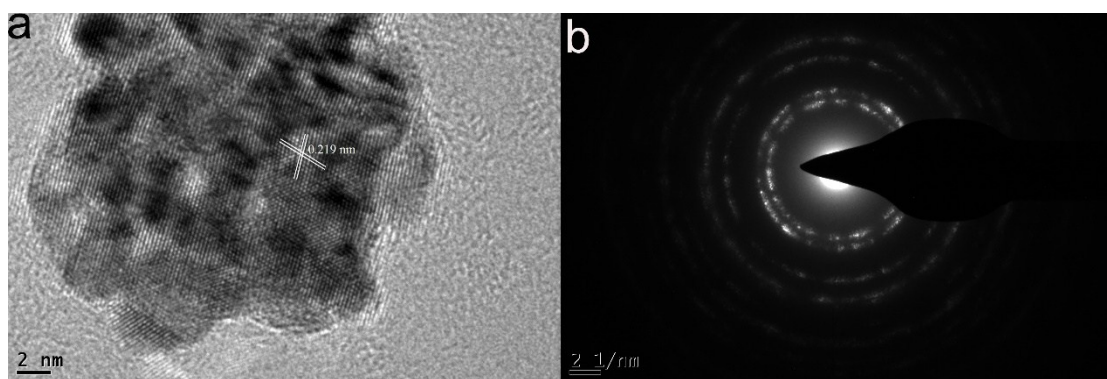

Figure S2 Representative (a) HRTEM images and (b) SAED patterns of 3D PdRu NFs.

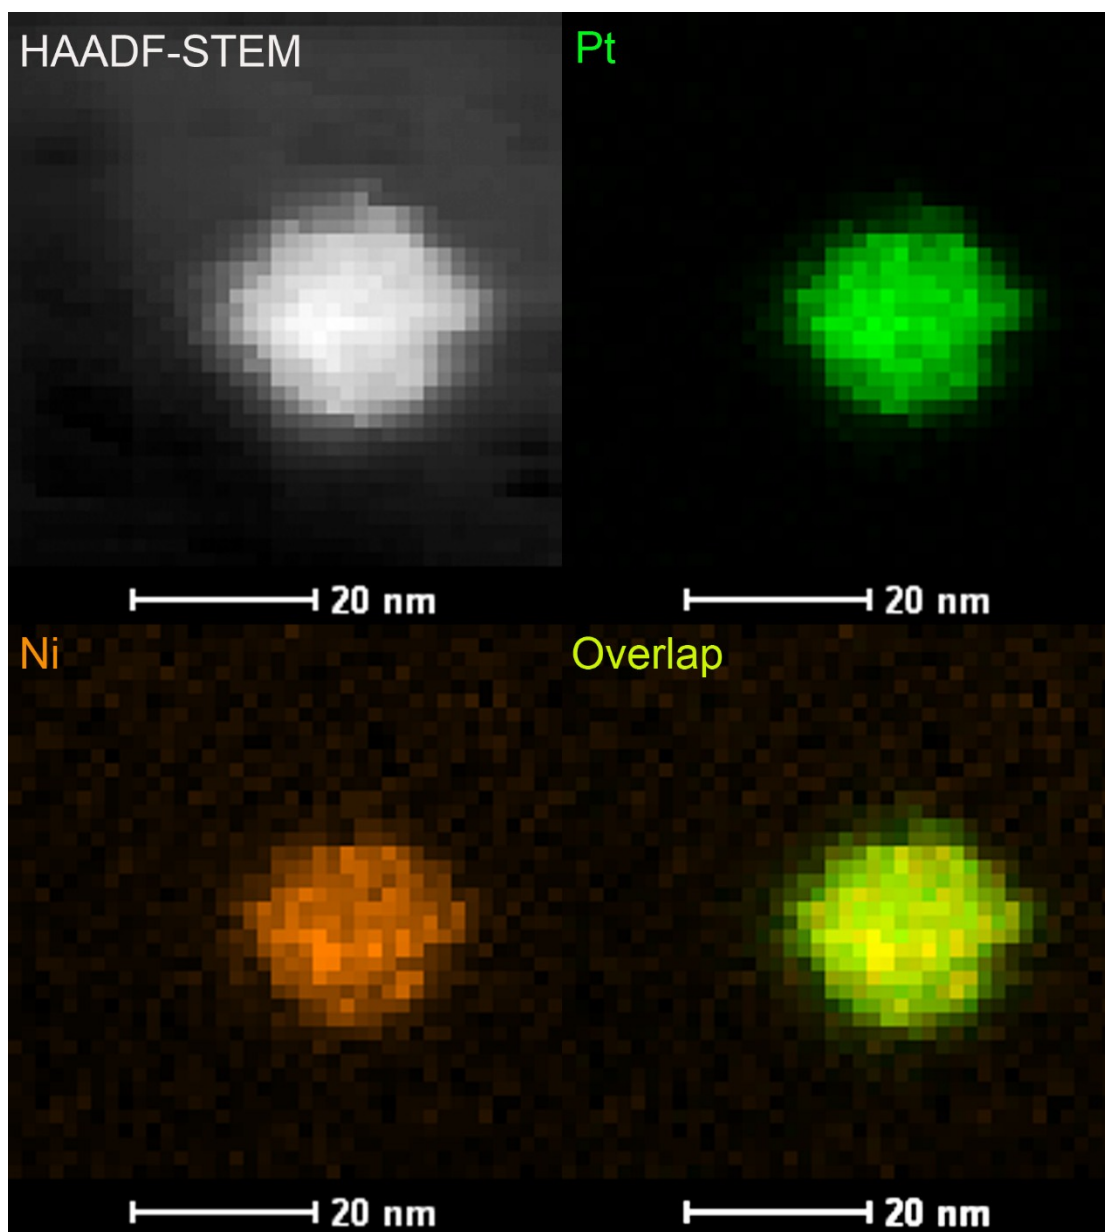

Figure S3 HAADF-STEM image and element mapping patterns of a single PdRu nanoflower.

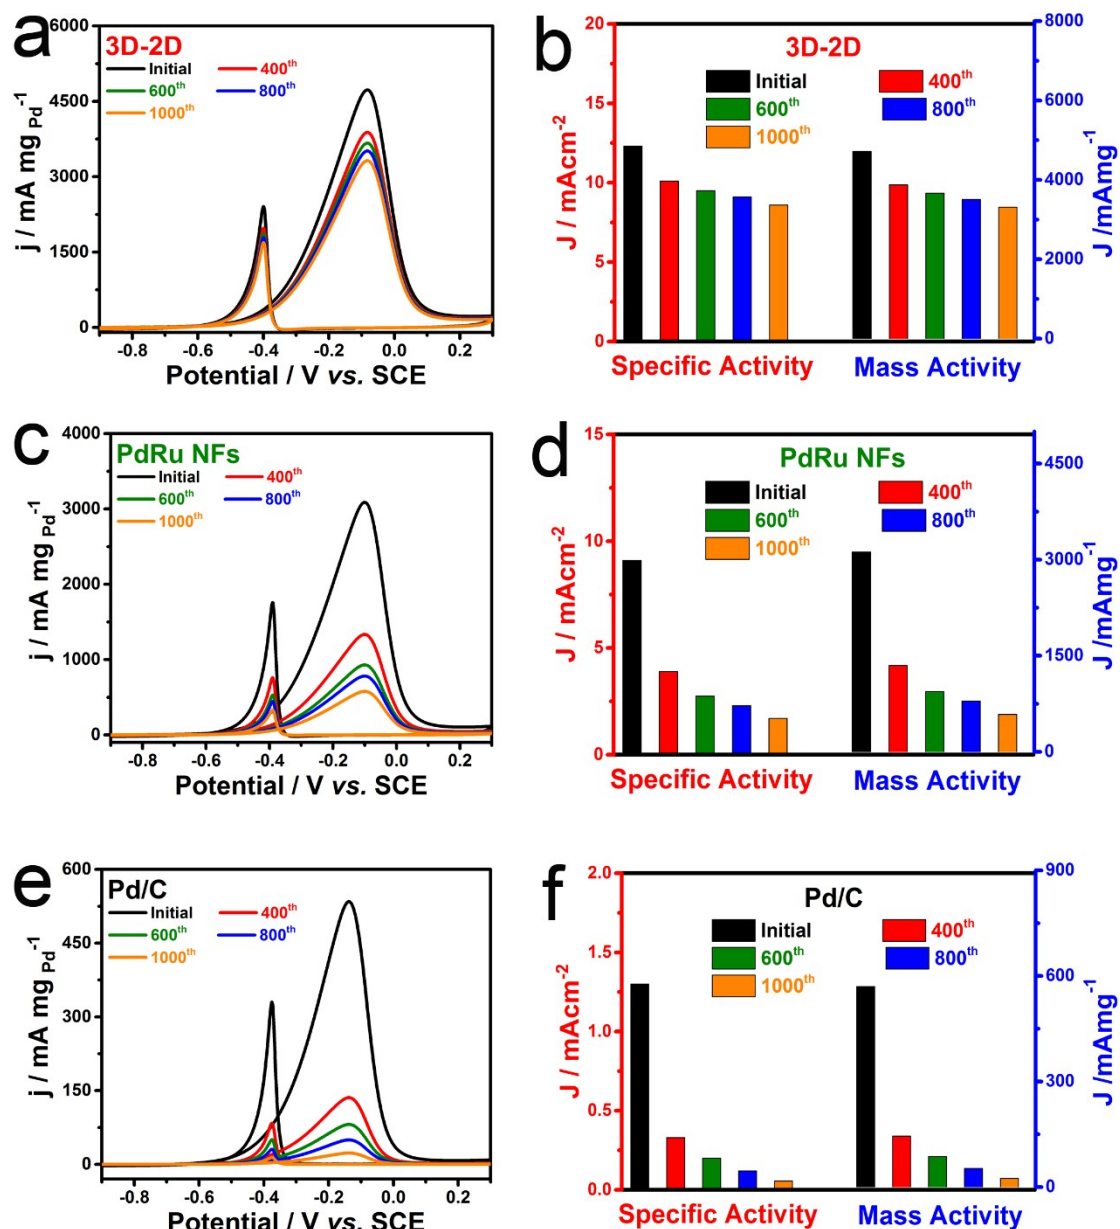

Figure S4 CV (1<sup>st</sup>, 400<sup>th</sup>, 600<sup>th</sup>, 800<sup>th</sup>, and 1000<sup>th</sup> cycle) of (a) 3D-2D nanohybrids, (b) 3D PdRu NFs, and (c) commercial Pd/C for EOR at 50 mV s<sup>-1</sup> in 1.0 M KOH + 1.0 M CH<sub>3</sub>CH<sub>2</sub>OH, respectively. Corresponding histograms for retained specific and mass activities of (d) 3D-2D nanohybrids, (e) 3D PdRu NFs, and (f) commercial Pd/C for EOR durability test.

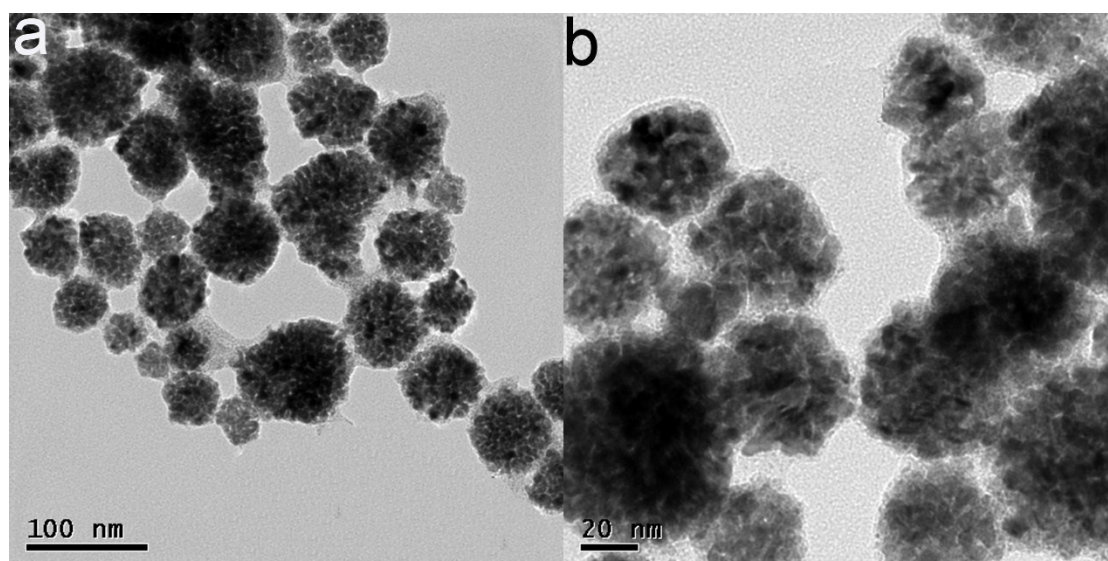

Figure S5 Representative TEM images of 3D PdRu NFs with different magnifications after long-term stability tests.

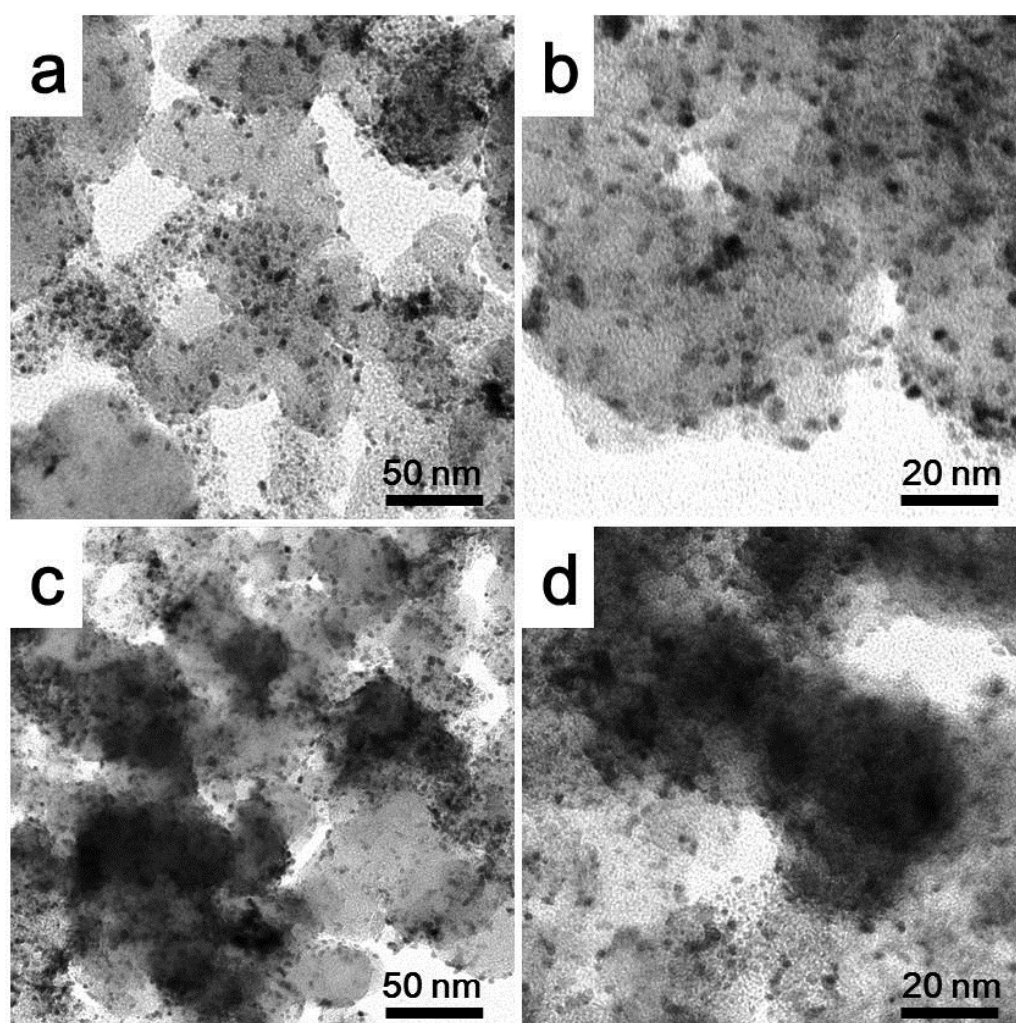

Figure S6 Typical TEM images of commercial Pd/C catalysts (a and b) before and (c and d) after long-term stability tests.

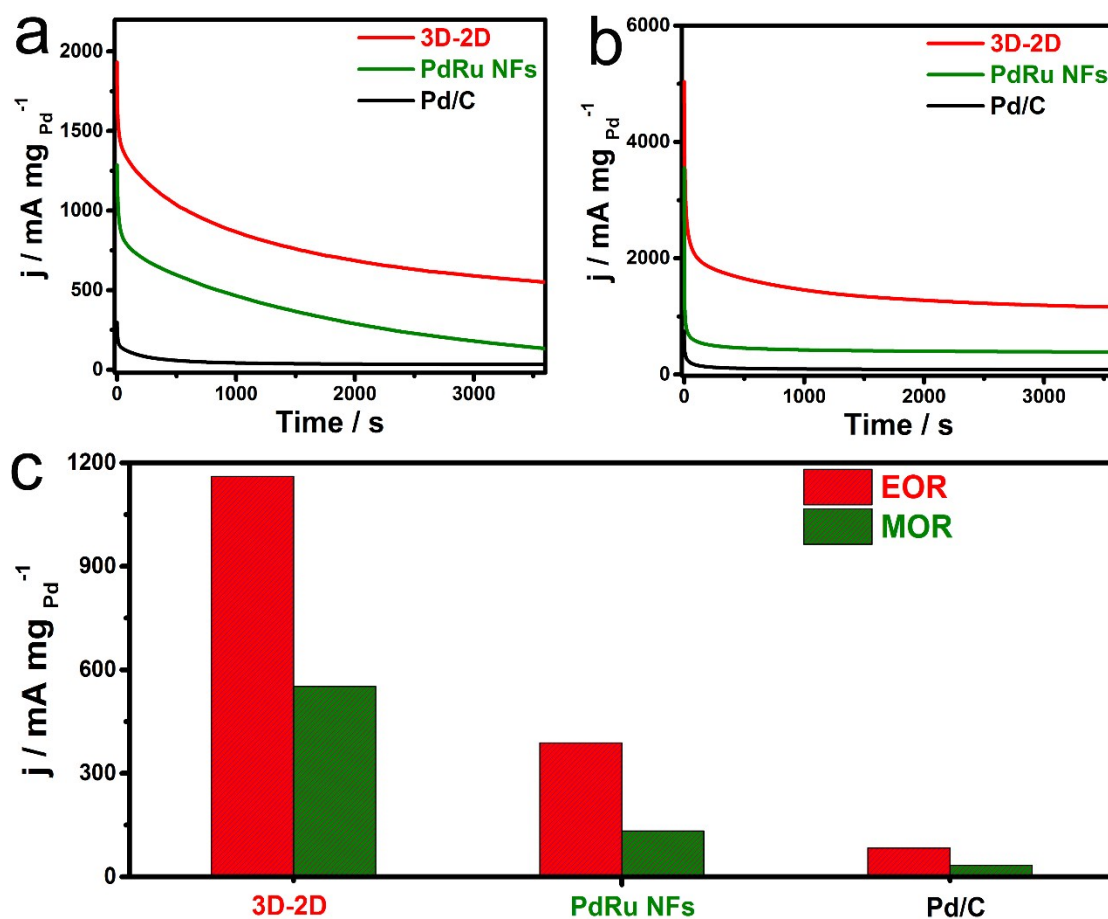

Figure S7 CA curves of 3D-2D nanohybrids, 3D PdRu NFs, and commercial Pd/C catalysts towards (a) MOR and (b) EOR at the fixed potentials of -0.3 and -0.15 V, respectively. (c) The corresponding histograms of the retained mass activities of 3D-2D nanohybrids, 3D PdRu NFs, and commercial Pd/C catalysts.

Table S1 A literature survey of the activity and stability of electrocatalysts toward MOR.

| Catalysts                                                 | Peaks currents from CV curves |                                         | Electrolyte                                                 | Cycling stability                    | References                                                          |
|-----------------------------------------------------------|-------------------------------|-----------------------------------------|-------------------------------------------------------------|--------------------------------------|---------------------------------------------------------------------|
|                                                           | J <sub>m</sub><br>(A/mg)      | J <sub>s</sub><br>(mA/cm <sup>2</sup> ) |                                                             |                                      |                                                                     |
| 3D-2D hybrids                                             | 1.7                           | 4.5                                     | 1.0 M KOH +<br>1.0 M<br>methanol                            | 72.4 % activity<br>after 1000 cycles | This work                                                           |
| Pd <sub>3</sub> Ru <sub>1</sub> P <sub>1.5</sub> NCs      | 1.26                          | NA                                      | 1.0 M KOH +<br>1.0 M<br>methanol                            | 56 % activity after<br>1000 cycles   | Int. J. Hydrogen<br>Energy <b>2017</b> , <i>42</i> ,<br>11229-11238 |
| PtNi Concave<br>Nanooctahedra                             | 0.44                          | 1.55                                    | 0.1 M HClO <sub>4</sub> +<br>1 M methanol                   | NA                                   | Angew. Chem. Int.<br>Ed. <b>2012</b> , <i>51</i> ,<br>12524-12528   |
| PtRu/G <sub>85</sub> (CN) <sub>15</sub>                   | 0.91                          | NA                                      | 0.1 M H <sub>2</sub> SO <sub>4</sub><br>+ 0.5 M<br>methanol | 63.5 % activity<br>after 1000 cycles | Carbon, <b>2015</b> , <i>93</i> ,<br>105-115                        |
| Fe <sub>28</sub> Pt <sub>38</sub> Pd <sub>34</sub><br>NWs | 0.48                          |                                         | 0.1M HClO <sub>4</sub> +<br>0.2 M<br>methanol               | NA                                   | J. Am. Chem. Soc.<br><b>2012</b> , <i>51</i> , 15354-<br>15357      |
| Pt <sub>0.3</sub> Ru <sub>0.6</sub> Pd <sub>0.1</sub>     | 1.04                          | 1.56                                    | 1 M KOH + 1<br>M methanol                                   | 48 % activity after<br>500 cycles    | New J. Chem.<br><b>2017</b> , <i>41</i> , 3048-<br>3054             |
| PtNi/C                                                    | 1.20                          |                                         | 1 M NaOH + 1<br>M methanol                                  | NA                                   | Catal. Commun.<br><b>2010</b> , <i>12</i> , 67-70                   |
| AuPt/MWCNT                                                | 1.60                          | 1.6                                     | 0.5 M KOH +<br>1 M methanol                                 | NA                                   | Electrochem.<br>Commun. <b>2008</b> ,<br><i>10</i> , 1748-1751      |
| PtAu/RGO/GC                                               | 1.60                          |                                         | 1 M KOH + 1<br>M methanol                                   | 69.8 % activity<br>after 500 cycles  | J. Mater. Chem. A<br><b>2013</b> , <i>1</i> , 7255-<br>7261         |
| PtPb <sub>0.27</sub> NWs/C                                | 1.21                          | 2.41                                    | 0.1 M HClO <sub>4</sub><br>+ 0.15 M<br>methanol             | 58.4 % activity<br>after 1000 cycles | Chem. Mater.<br><b>2016</b> , <i>28</i> , 4447-<br>4452             |
| PtPb<br>Nanorods/C                                        | 0.70                          |                                         | 0.1 M H <sub>2</sub> SO <sub>4</sub><br>+ 0.5 M<br>methanol | NA                                   | J. Am. Chem. Soc.<br><b>2007</b> , <i>129</i> , 8684-<br>8685       |
| PtCu<br>Nanotubes/C                                       |                               | 4.7                                     | 0.1 M HClO <sub>4</sub><br>+ 1 M<br>methanol                | NA                                   | Angew. Chem. Int.<br>Ed. <b>2009</b> , <i>48</i> ,<br>4217-4221     |
| PtCu <sub>2.1</sub> NWs                                   | 1.56                          | 3.31                                    | 0.1 M HClO <sub>4</sub> +<br>1 M methanol                   | 70.1 % activity                      | Nano Lett. <b>2016</b> ,                                            |

|                       |        |        |                                                          |                                   |                                                         |
|-----------------------|--------|--------|----------------------------------------------------------|-----------------------------------|---------------------------------------------------------|
|                       |        |        | 0.2 M methanol                                           | after 1000 cycles                 | 16, 5037--5043                                          |
| Highly branched Pt–Ni | NA     | 0.93   | 0.1 M HClO <sub>4</sub> +<br>0.1 M methanol              | 67.3 % activity after 4000 cycles | Chem. Sci. <b>2012</b> , 3, 1925-1929                   |
| PtZn Nanoparticles/C  |        | ~ 0.92 | 0.1 M H <sub>2</sub> SO <sub>4</sub><br>+ 0.5 M methanol | NA                                | ACS Nano <b>2012</b> , 6, 5642-5647                     |
| THH PtNi NFs          | 0.84   | 2.19   | 0.1 M HClO <sub>4</sub> +<br>0.2 M methanol              | 20.0 % activity after 600 cycles  | Nano Lett. <b>2016</b> , 16, 2762-2767                  |
| Pt <sub>3</sub> Cu/C  | ~ 0.70 | ~ 0.50 | 0.5 M HClO <sub>4</sub> +<br>1 M methanol                | NA                                | ACS Appl. Mater. Interface <b>2014</b> , 6, 17748-17752 |

Table S2 A literature survey of the activity and stability of electrocatalysts toward EOR.

| Catalysts                                     | Peaks currents from CV curves |                                         | Electrolyte                                             | Cycling stability                 | References                                                   |
|-----------------------------------------------|-------------------------------|-----------------------------------------|---------------------------------------------------------|-----------------------------------|--------------------------------------------------------------|
|                                               | J <sub>m</sub><br>(A/mg)      | J <sub>s</sub><br>(mA/cm <sup>2</sup> ) |                                                         |                                   |                                                              |
| 3D-2D hybrids                                 | 4.7                           | 12.3                                    | 1.0 M KOH<br>+ 1.0 M ethanol                            | 70.2 % activity after 1000 cycles | This work                                                    |
| Pt-Cu Nanocone                                | ~ 0.4                         | 2.97                                    | 0.5 M H <sub>2</sub> SO <sub>4</sub><br>+ 1.0 M ethanol | NA                                | J. Am. Chem. Soc. <b>2013</b> , <i>135</i> , 18304-18307     |
| Pd/C promoted with CaSiO <sub>3</sub>         | 1.5                           | NA                                      | 1.0 M KOH<br>+ 1.0 M ethanol                            | 60 % activity after 1000 cycles   | Electrochim. Acta <b>2015</b> , <i>158</i> , 18-23           |
| Pd <sub>7</sub> Ru <sub>1</sub> nanodendrites | 1.15                          |                                         | 1.0 M KOH<br>+ 1.0 M ethanol                            | 67.7 % activity after 500 cycles  | Nanoscale <b>2015</b> , <i>7</i> , 12445-12451               |
| Tetrahexahedral PtNi Nanoframes/C             | 0.77                          | 1.99                                    | 0.1M HClO <sub>4</sub> + 0.2 M ethanol                  | NA                                | Nano Lett. <b>2016</b> , <i>16</i> , 2762-2767               |
| PdPt@Pt/rGO                                   | 0.074                         |                                         | 0.5 M H <sub>2</sub> SO <sub>4</sub><br>+ 0.5 M Ethanol | NA                                | ACS Appl. Mater. Inter. <b>2014</b> , <i>6</i> , 10549-10555 |
| PdCu <sub>2</sub>                             | 1.6                           |                                         | 1.0 M KOH<br>+ 1 M ethanol                              | 70 % activity after 300 cycles    | ACS Appl. Mater. Interfaces <b>2016</b> , <i>8</i> , 34497   |
| Pt-Pd CNCS                                    | 1.07                          |                                         | 1.0 M KOH<br>+ 1 M ethanol                              | NA                                | J. Mater. Chem. A <b>2014</b> , <i>2</i> , 13840-13844       |
| PdNi                                          | 1.5                           |                                         | 1.0 M KOH<br>+ 1 M ethanol                              | 60 % activity after 500 cycles    | J. Colloid Interface Sci. <b>2017</b> , <i>493</i> , 190-197 |
| PtAu ANFs                                     | 1.21                          | 0.95                                    | 0.5 M KOH<br>+ 0.5 M ethanol                            | NA                                | Int. J. Hydrogen Energy <b>2016</b> , <i>41</i> , 1645-1653  |
| PtSn Nanocrystals/CNT                         |                               | ~ 0.741                                 | 0.5 M H <sub>2</sub> SO <sub>4</sub><br>+ 1 M ethanol   | NA                                | Angew. Chem. Int. Ed. <b>2016</b> , <i>55</i> , 4952-4956    |
| PtRu Nanoparticles/XC                         | 0.189                         |                                         | 0.5 M H <sub>2</sub> SO <sub>4</sub><br>+ 0.5 M         | 52 % activity after 500 cycles    | Electrochim. Acta <b>2014</b> , <i>142</i> , 223-            |



|                            |      |         |                                                    |                                   |                                                  |
|----------------------------|------|---------|----------------------------------------------------|-----------------------------------|--------------------------------------------------|
|                            |      |         | ethanol                                            |                                   | 227                                              |
| PtPb <sub>0.27</sub> NPs/C | 0.25 | 1.19    | 0.1 M HClO <sub>4</sub> + 0.2 M ethanol            | 31.6 % activity after 1000 cycles | Chem. Mater. <b>2016</b> , 28, 4447-4452.        |
| Pt-CoSn/C                  | 0.55 |         | 0.5 M H <sub>2</sub> SO <sub>4</sub> + 1 M ethanol | NA                                | J. Power Sources. <b>2011</b> , 196, 8000-8003   |
| PtAu NWs                   |      | ~ 0.741 | 1 M KOH + 0.1 M ethanol                            | NA                                | Energy Environ. Sci., <b>2012</b> , 5, 8328-8334 |
| THH PtNi NFs               | 0.77 | 1.99    | 0.5 M HClO <sub>4</sub> + 0.2 M ethanol            | 30 % activity after 300 cycles    | Nano Lett. <b>2016</b> , 16, 2762-2767           |
